# Supplementary material for: Single-crystalline perovskite wafers with a Cr blocking layer for broad and stable light detection in a harsh environment
Source: Royal Society of Chemistry journal article supplement (doi:10.1039/c8ra02709a), 2018-01-01
Supplement: c8ra02709a1.pdf [file c8ra02709a1.pdf]

## **Supporting Information**

### **Single-Crystalline Perovskite Wafers with Cr blocking layer for Broad and Stable Light Detection in Harsh Environment**

Qian Wang<sup>1,#</sup>, Dongliang Bai<sup>1,#</sup>, Zhiwen Jin<sup>1,\*</sup>, and Shengzhong (Frank) Liu<sup>1,2,\*</sup>

These authors contributed equally to this work.

<sup>1</sup>Key Laboratory of Applied Surface and Colloid Chemistry, Ministry of Education; Shaanxi Key Laboratory for Advanced Energy Devices; Shaanxi Engineering Lab for Advanced Energy Technology; School of Materials Science & Engineering, Shaanxi Normal University, Xi'an, 710119, P. R. China.

E-mail: jinzhiwen@snnu.edu.cn

<sup>2</sup>Dalian National Laboratory for Clean Energy; iChEM, Dalian Institute of Chemical Physics, Chinese Academy of Sciences, Dalian, 116023, P. R. China

E-mail: szliu@dicp.ac.cn

Keywords: single crystal, perovskite, wafer, photodetector, stability

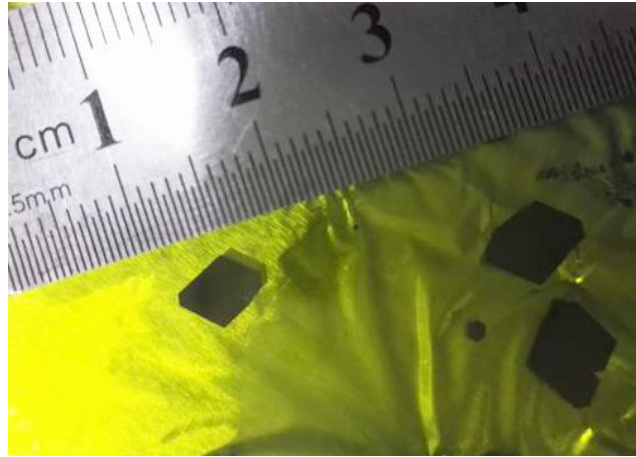

**Figure S1.** Photograph for the as-grown single crystals perovskite wafer.

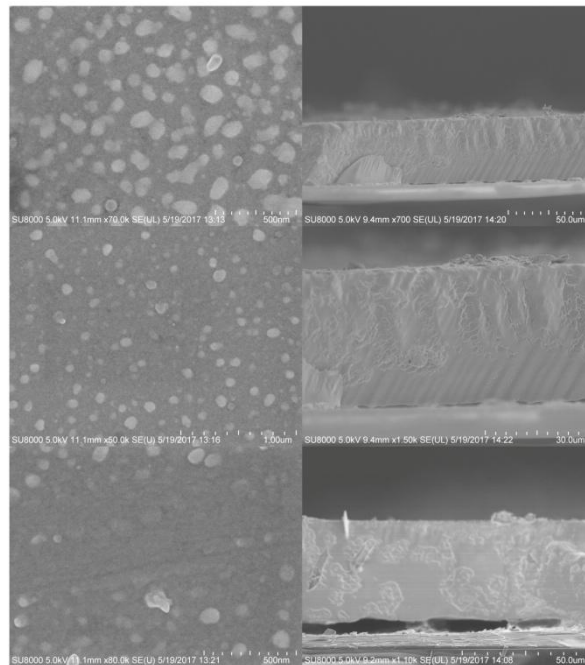

**Figure S2.** Surface and cross-section SEM images for the wafer at different parts.

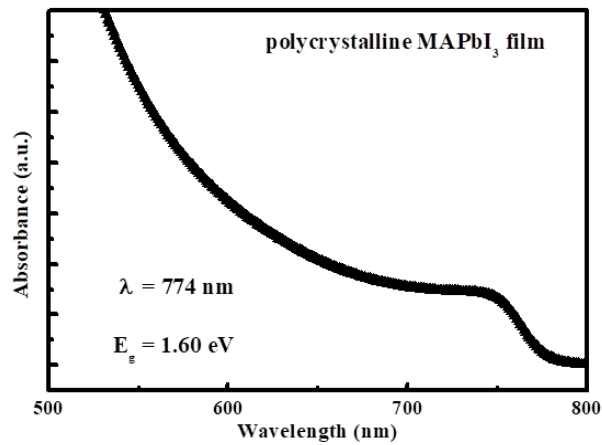

**Figure S3.** Absorption spectrum of the polycrystalline MAPbI<sub>3</sub> film.
